# Supplementary material
Source: PubMed Central journal article supplement (PMC3174338)
Supplement: NIHMS298029-supplement-1.pdf [file NIHMS298029-supplement-1.pdf]

## **SUPPLEMENTAL MATERIAL: Upregulation of Fanconi Anemia DNA Repair Genes in Melanoma Compared to Non-Melanoma Skin Cancer, Kao *et al*.**

### **MATERIALS AND METHODS**

#### **Tissue specimens**

Harvesting of tumors and purification and hybridization of RNA has been previously described (Riker *et al.*, 2008). Briefly, 40 metastatic melanomas (MM), 16 primary cutaneous melanomas (PCM), 11 squamous cell carcinomas (SCC), and 15 basal cell carcinomas (BCC) were obtained under a protocol approved by the Institutional Review Boards of the Moffitt Cancer Center and the Ponce School of Medicine (MCC#13448, IRB#101751; PSM# 990914-JM, 020318-JM) and frozen in liquid nitrogen. The study was conducted according to Declaration of Helsinki Principles, and written informed consent was obtained from participants. Melanomas were staged according to the *American Joint Committee on Cancer Staging System for Cutaneous Melanoma* (Balch *et al.*, 2001), based on Breslow depth (Breslow, 1979) and the presence of lymph node involvement and/or metastasis. Four samples of normal human skin were used as negative controls.

#### **RNA isolation, purification, and hybridization**

Cryopreserved tissue was dissolved in TRIzol<sup>®</sup> (Invitrogen, Carlsbad, CA) and purified using RNeasy columns (Qiagen Inc., Valencia, CA). 5 µg of RNA was processed using established Affymetrix protocols for the generation of biotin-labeled

cRNA and the hybridization, staining, and scanning of arrays as outlined in Affymetrix technical manuals (Van Gelder *et al.*, 1990; Warrington *et al.*, 2000). Briefly, RNA was converted into double-stranded cDNA by reverse transcription using a cDNA synthesis kit (Invitrogen). An oligo(dT)<sub>24</sub> primer (Affymetrix, T7-oligo(dT) Promoter Primer kit) was then used to generate cRNA, which was then purified using an Affymetrix GeneChip Sample Cleanup module. RNA integrity was verified by gel electrophoresis and the Agilent 2100 Bioanalyzer (Agilent Technologies, Palo Alto, CA). Further procedural details have been published previously (Dobbin *et al.*, 2005). The processed RNA was then hybridized to Human Genome U133 Plus 2.0 arrays from Affymetrix, Inc. (Santa Clara, CA), and scanned on an Affymetrix GeneChip<sup>®</sup> scanner 3000 at 2.5  $\mu\text{m}$  resolution.

### **DNA microarray analysis**

Initial characterization of global gene expression profiles in metastatic and primary skin cancers has been previously published (Riker *et al.*, 2008). The microarrays used in this study are available on-line at the Gene Expression Omnibus (<http://www.ncbi.nlm.nih.gov/geo/query/acc.cgi?acc=GSE7553>). Scanned output files were visually inspected for hybridization artifacts. MAS 5.0 analysis software was then utilized to generate signal values for all probe sets based upon a mean intensity of 500. Signal values below 25 were truncated to 25 (Li and Wong, 2001). The tissue samples were processed in three independent groups. Expression levels of each gene in each tumor sample were then normalized with respect to mean intensity in the 4 normal skin samples. A 235-probe subset corresponding to known human DNA repair genes was selected as the starting point for this study (Wood *et al.*, 2005; Wood *et al.*, 2001). Visual

inspection of raw microarray data was used initially to identify candidate genes for possible differential expression in melanoma vs. non-melanoma samples. Differences from normal skin were then formally evaluated using a two-tailed Student's *t*-test, assuming unequal variance between samples (Microsoft Excel, Redmond, WA). A *p*-value of less than .05 was used as the cutoff for statistical significance.

### **Quantitative RT-PCR**

For qRT-PCR experiments, cDNA synthesis was done using the Oligo dT primers cDNA synthesis kit (Bio-Rad, Hercules, CA). cDNAs were purified using PCR purification kit (Qiagen). The cDNAs were subsequently analyzed by qPCR using SYBR Green (Bio-Rad) and the Bio-Rad Chromo 4 DNA Engine Thermal Cycler. FANCD2 expression levels were normalized to beta actin mRNA levels. Gene specific primer sequences were as follows: FANCD2 FP- ACGGTGCTAGAGAGCTGCTT, FANCD2 RP- TGTTCTCAGCACACTGGCAT, ACTB FP-TGAAGTGTGACGTGGACATC, and ACTB RP-GGAGGAAGCAATGATCTTGAT.

### **Immunohistochemistry**

Paraffin sections were washed 3 times in xylene (Sigma, St. Louis MO) and then rehydrated in 100% ethanol, 95% ethanol, followed by double distilled water (ddH<sub>2</sub>O). Antigen retrieval was performed by incubation in 10 mM sodium citrate (pH 6.0) at 85°C for 10 minutes. Slides were cooled at room temperature for 30 minutes, washed with ddH<sub>2</sub>O, treated with 3% hydrogen peroxide, and again rinsed with ddH<sub>2</sub>O. The region of interest was washed with 1x PBS/0.1% Tween-20 (PBST), blocked for one hour at room temperature with PBST + 5% goat serum (Vector Laboratories, Burlingame, CA), and

incubated with 1:50 anti-FANCD2 (H-300) (sc28194, Santa Cruz Inc, Santa Cruz, CA) at 4°C overnight. The specificity of this antibody has been characterized and validated previously (Alexander *et al.*, 2010). The slides were washed with PBST, incubated with biotinylated anti-rabbit antibody (Vector Laboratories, Burlingame CA) for 30 minutes at room temperature, and following 3 additional PBST washes, developed using ABC method (Vector Laboratories, Burlingame CA). Sections were counterstained with Mayer's hematoxylin and mounted with Permount™ Mounting Medium (Electron Microscopy Sciences, Hatfield, PA). Representative 40X images were taken and analyzed using Image J (<http://rsbweb.nih.gov/ij/>). Approximately 2,500 tumor cells were analyzed.

**Supplemental Table S1. Characteristics of tumors included in this study.**

| <b>Tumor</b> | <b>Subtype (if applicable)</b> | <b>Number of cases</b> |
|--------------|--------------------------------|------------------------|
| SCC          | All                            | 11                     |
| BCC          | All                            | 15                     |
| PCM          | <i>in situ</i>                 | 2                      |
|              | Thin (<1 mm)                   | 2                      |
|              | Intermediate (1-4 mm)          | 3                      |
|              | Thick (>4 mm)                  | 9                      |
| MM           | Lymph node                     | 22                     |
|              | Subcutaneous                   | 16                     |
|              | Solid organ metastases         | 2                      |

SCC, squamous cell carcinoma

BCC, basal cell carcinoma

PCM, primary cutaneous melanoma

MM, metastatic melanoma

**Supplemental Table S2. Statistical analysis of FA genes from DNA microarray shown in Figure 1a.**

| Gene         | Metastatic Melanoma |            |         | Squamous Cell Carcinoma |            |         |
|--------------|---------------------|------------|---------|-------------------------|------------|---------|
|              | Avg.                | 95% CI     | P-value | Avg.                    | 95% CI     | P-value |
| FANCA        | 2.16                | 1.20; 3.12 | 0.013†  | 1.22                    | 0.35; 2.08 | 0.473   |
| FANCB        | 4.58                | 3.38; 5.77 | <.001†  | 2.16                    | 1.08; 3.23 | 0.023†  |
| FANCC        | 1.02                | 0.86; 1.18 | 0.843   | 0.73                    | 0.43; 1.03 | 0.126   |
| FANCE        | 0.71                | 0.21; 1.20 | 0.284   | 1.35                    | 0.74; 1.96 | 0.274   |
| FANCF        | 1.40                | 1.13; 1.67 | .003†   | 0.94                    | 0.70; 1.17 | 0.579   |
| FANCG        | 1.69                | 1.46; 1.92 | <.001†  | 1.11                    | 0.82; 1.39 | 0.627   |
| FANCL        | 2.13                | 1.80; 2.47 | <.001†  | 0.96                    | 0.75; 1.17 | 0.764   |
| FANCM        | 1.09                | 0.76; 1.42 | 0.499   | 1.03                    | 0.69; 1.36 | 0.885   |
| FANCI        | 3.33                | 2.83; 3.83 | <.001†  | 2.32                    | 1.84; 2.81 | <.001†  |
| FANCD2       | 2.01                | 1.54; 2.48 | 0.002†  | 1.01                    | 0.54; 1.48 | 0.974   |
| FANCD1/BRCA2 | 3.04                | 2.17; 3.90 | <.001†  | 2.43                    | 1.25; 3.62 | 0.004†  |
| FANCN/PALB2  | 1.47                | 1.16; 1.77 | <.016†  | 1.20                    | 0.90; 1.50 | 0.195   |
| FANCJ/BRIP1  | 3.31                | 2.09; 4.54 | <.001†  | 2.20                    | 1.23; 3.17 | 0.020†  |

Avg., average gene expression relative to normal skin; 95%CI, 95% confidence interval

† P-value < .05.

**Supplemental Table S3. Aggregate FANCD2 and FANCL mRNA expression in BCC relative to normal skin based on DNA microarray data**

| <b>BCC Sample number</b> | <b>FANCD2+ FANCL levels relative to normal skin</b> |
|--------------------------|-----------------------------------------------------|
| <b>1</b>                 | <b>1.24</b>                                         |
| <b>2</b>                 | <b>0.88</b>                                         |
| <b>3</b>                 | <b>1.37</b>                                         |
| <b>4</b>                 | <b>1.42</b>                                         |
| <b>5</b>                 | <b>1.00</b>                                         |
| <b>6</b>                 | <b>1.09</b>                                         |
| <b>7</b>                 | <b>1.01</b>                                         |
| <b>8</b>                 | <b>1.41</b>                                         |
| <b>9</b>                 | <b>1.21</b>                                         |
| <b>10</b>                | <b>1.38</b>                                         |
| <b>11</b>                | <b>1.42</b>                                         |
| <b>12</b>                | <b>1.38</b>                                         |
| <b>13</b>                | <b>0.92</b>                                         |
| <b>14</b>                | <b>0.93</b>                                         |
| <b>15</b>                | <b>1.10</b>                                         |

**Supplemental Table S4. Statistical analysis of genes from the NER pathway from DNA microarray shown in Figure 1a.**

| Gene   | Metastatic Melanoma |            |         | Squamous Cell Carcinoma |            |         |
|--------|---------------------|------------|---------|-------------------------|------------|---------|
|        | Avg.                | 95% CI     | P-value | Avg.                    | 95% CI     | P-Value |
| XPA    | 0.611               | 0.42; 0.80 | .012†   | 0.83                    | 0.61; 1.06 | .148    |
| XPB    | 1.378               | 1.20; 1.55 | < .001† | 0.90                    | 0.70; 1.09 | 0.255   |
| XPC    | 0.973               | 0.69; 1.26 | 0.843   | 0.59                    | 0.32; 0.87 | 0.031†  |
| XPD    | 1.451               | 0.60; 2.30 | 0.301   | 1.66                    | 0.77; 2.55 | 0.160   |
| RAD23A | 1.185               | 0.91; 1.46 | 0.052   | 1.10                    | 0.84; 1.35 | 0.584   |
| RAD23B | 0.583               | 0.48; 0.68 | < .001† | 1.20                    | 1.08; 1.32 | .003†   |
| XPE    | 0.556               | 0.27; 0.84 | 0.024†  | 1.07                    | 0.77; 1.36 | 0.517   |
| XPF    | 1.018               | 0.36; 1.68 | 0.947   | 0.80                    | 0.11; 1.48 | 0.490   |
| XPG    | 0.669               | 0.56; 0.78 | < .001† | 0.98                    | 0.75; 1.20 | 0.816   |

Avg., average gene expression relative to normal skin; 95%CI, 95% confidence interval

† P-value < .05.



**Supplemental Table S5. Statistical analysis of FA genes in PCM from DNA microarray in Figure 1b.**

|                   | Melanoma <i>in situ</i> |             |        | Thin  |            |       | Intermediate |            |        | Thick |            |         |
|-------------------|-------------------------|-------------|--------|-------|------------|-------|--------------|------------|--------|-------|------------|---------|
| Breslow Thickness | n/a                     |             |        | < 1mm |            |       | 1-4 mm       |            |        | >4 mm |            |         |
| Gene              | Avg                     | 95% CI      | P      | Avg   | 95% CI     | P     | Avg          | 95% CI     | P      | Avg.  | 95% CI     | P       |
| FANCA             | 1.20                    | 0.04; 2.34  | 0.319  | 2.01  | 0.46; 3.55 | 0.202 | 1.82         | 0.35; 3.29 | 0.108  | 3.35  | 1.26; 4.71 | 0.01 †  |
| FANCB             | 2.53                    | -0.42; 5.48 | 0.346  | 0.78  | 0.12; 1.44 | 0.849 | 1.72         | 1.06; 2.38 | 0.043† | 5.15  | 3.09; 8.39 | < .001† |
| FANCC             | 0.55                    | 0.08; 1.03  | 0.058  | 0.60  | 0.16; 1.05 | 0.084 | 0.91         | 0.52; 1.30 | 0.637  | 1.44  | 1.06; 2.49 | 0.004 † |
| FANCE             | 0.70                    | 0.25; 1.16  | 0.277  | 0.82  | 0.34; 1.31 | 0.983 | 0.74         | 0.20; 1.27 | 0.373  | 0.99  | 0.37; 1.36 | 0.959   |
| FANCF             | 0.78                    | 0.42; 1.14  | 0.053  | 0.75  | 0.37; 1.13 | 0.275 | 0.94         | 0.57; 1.30 | 0.575  | 1.23  | 0.73; 1.79 | 0.316   |
| FANCG             | 0.98                    | 0.90; 1.06  | 0.654  | 1.12  | 0.66; 1.59 | 0.675 | 1.20         | 1.06; 1.34 | 0.044† | 2.15  | 1.31; 2.99 | 0.016†  |
| FANCL             | 1.02                    | 0.89; 1.15  | 0.741  | 1.10  | 0.77; 1.44 | 0.456 | 1.54         | 1.23; 1.84 | 0.031† | 2.17  | 1.23; 3.43 | 0.028†  |
| FANCM             | 1.49                    | 0.72; 2.26  | 0.176  | 0.79  | 0.13; 1.45 | 0.402 | 0.89         | 0.27; 1.51 | 0.634  | 1.25  | 0.81; 2.06 | 0.227   |
| FANCI             | 1.45                    | 0.86; 2.03  | 0.210  | 1.17  | 0.74; 1.60 | 0.284 | 1.21         | 0.81; 1.62 | 0.194  | 3.40  | 2.44; 4.36 | < .001† |
| FANCD2            | 0.50                    | 0.08; 0.92  | 0.048  | 1.23  | 0.40; 2.06 | 0.838 | 1.29         | 0.77; 1.81 | 0.275  | 2.44  | 1.27; 3.79 | 0.027†  |
| FANCD1/<br>BRCA2  | 1.63                    | 0.08; 3.17  | 0.502  | 1.13  | -1.05;3.31 | 0.924 | 1.85         | 0.52; 3.17 | 0.254  | 3.12  | 1.51; 4.74 | 0.027†  |
| FANCN             | 1.26                    | 1.03; 1.49  | 0.024† | 1.01  | -0.08;2.10 | 0.826 | 1.01         | 0.05; 1.97 | 0.644  | 1.44  | 1.01; 1.86 | 0.032†  |
| FANCI             | 1.57                    | 0.89; 2.25  | 0.144  | 0.87  | -0.54;2.29 | 0.891 | 0.82         | -0.64;2.28 | 0.832  | 2.12  | 0.80; 3.44 | 0.127   |

Avg., average gene expression relative to normal skin; 95%CI, 95% confidence interval

† P-value < .05.

**Supplemental Table S6. Statistical analysis of NER pathway genes from DNA microarray in Figure 1b.**

|                | <i>Melanoma in situ</i> |             |        | Thin  |            |       | Intermediate |             |        | Thick |             |         |
|----------------|-------------------------|-------------|--------|-------|------------|-------|--------------|-------------|--------|-------|-------------|---------|
| Breslow Thick. | n/a                     |             |        | <1 mm |            |       | 1-4 mm       |             |        | >4 mm |             |         |
| Gene           | Avg.                    | 95% CI      | P      | Avg.  | 95% CI     | P     | Avg.         | 95% CI      | P      | Avg.  | 95% CI      | P       |
| XPA            | 0.97                    | 0.77; 1.17  | 0.763  | 1.06  | 0.79; 1.34 | 0.642 | 1.12         | 0.863; 1.37 | 0.360  | 0.62  | 0.36; 0.88  | 0.015†  |
| XPB            | 0.79                    | 0.68; 0.91  | 0.027† | 1.01  | 0.29; 1.73 | 0.976 | 1.29         | 1.07; 1.51  | 0.027† | 1.33  | 0.92; 1.74  | 0.105   |
| XPC            | 1.01                    | 0.46; 1.56  | 0.972  | 0.76  | 0.34; 1.17 | 0.308 | 1.11         | 0.742; 1.49 | 0.532  | 0.86  | 0.51; 1.20  | 0.380   |
| XPD            | 1.87                    | -0.47; 4.21 | 0.575  | 1.67  | 0.88; 2.47 | 0.166 | 1.64         | 0.829; 2.45 | 0.182  | 2.62  | -0.11; 5.35 | 0.224   |
| RAD23A         | 1.11                    | 0.70; 1.52  | 0.564  | 0.95  | 0.57; 1.33 | 0.782 | 0.77         | 0.475; 1.06 | 0.084  | 1.44  | 0.56; 2.32  | 0.320   |
| RAD23B         | 1.04                    | 0.87; 1.22  | 0.602  | 1.07  | 0.65; 1.49 | 0.718 | 0.83         | 0.567; 1.08 | 0.167  | 0.52  | 0.41; 0.64  | < .001† |
| XPE            | 1.18                    | 0.61; 1.62  | 0.664  | 0.79  | 0.42; 1.17 | 0.313 | 0.82         | 0.61; 1.18  | 0.450  | 0.61  | 0.24; 0.98  | 0.046†  |
| XPF            | 0.54                    | 0.05; 1.04  | 0.156  | 0.74  | 0.04; 1.45 | 0.976 | 0.81         | 0.264; 1.35 | 0.489  | 1.29  | 0.49; 1.95  | 0.532   |
| XPG            | 1.57                    | 0.87; 2.28  | 0.316  | 1.26  | 0.93; 1.60 | 0.074 | 1.15         | 0.856; 1.45 | 0.355  | 0.78  | 0.49; 1.09  | 0.158   |

Avg., average gene expression relative to normal skin; 95%CI, 95% confidence interval

† P-value < .05.

**Supplemental Table S7. Characteristics of tumors included in immunohistochemistry analysis.**

| <b>Diagnosis</b> | <b>Age</b> | <b>Sex</b> | <b>Location</b> | <b>Breslow</b> |
|------------------|------------|------------|-----------------|----------------|
| Melanoma         | 74         | F          | Back            | 0.4            |
| Melanoma         | 56         | F          | R Arm           | 0.75           |
| Melanoma         | 60         | F          | R Knee          | 1.75           |
| Melanoma         | 54         | M          | R Arm           | 2.0            |
| BCC              | 49         | F          | R NLF           | N/A            |
| SCC              | 60         | M          | Chest           | N/A            |
| SCC              | 69         | M          | Back            | N/A            |
| SCC              | 58         | M          | L Arm           | N/A            |

Breslow, depth in mm; NLF, nasolabial fold; N/A, not applicable

**Supplemental Table S8. Statistical analysis of Histone H3 and Cyclin A/E gene expression from DNA microarray analysis in PCM and NMSC.**

|                | Melanoma <i>in situ</i> |           |        | Thin  |           |       | Intermediate |           |       | Thick |           |         |
|----------------|-------------------------|-----------|--------|-------|-----------|-------|--------------|-----------|-------|-------|-----------|---------|
| Breslow Thick. | n/a                     |           |        | <1 mm |           |       | 1-4 mm       |           |       | >4 mm |           |         |
| Gene           | Avg.                    | Std. Dev. | P      | Avg.  | Std. Dev. | P     | Avg.         | Std. Dev. | P     | Avg   | Std. Dev. | P       |
| Cyclin E2      | 1.14                    | 0.64      | 0.479  | 1.51  | 0.85      | 0.980 | 1.25         | 0.55      | 0.320 | 0.87  | 0.46      | < .001† |
| Cyclin A1      | 2.10                    | 1.20      | 0.370  | 0.67  | 0.56      | 0.06  | 1.00         | 0.48      | 0.01† | 1.56  | 0.84      | 0.070   |
| Hist H3        | 1.04                    | 0.82      | 0.012† | 1.56  | 1.91      | 0.308 | 2.48         | 2.51      | 0.229 | 1.19  | 1.15      | 0.028†  |
|                |                         |           |        |       |           |       |              |           |       |       |           |         |
|                | NMSC                    |           |        |       |           |       |              |           |       |       |           |         |
|                | Avg.                    | Std. Dev  |        |       |           |       |              |           |       |       |           |         |
| Cyclin E2      | 1.54                    | 0.96      |        |       |           |       |              |           |       |       |           |         |
| Cyclin A1      | 2.34                    | 1.44      |        |       |           |       |              |           |       |       |           |         |
| Hist H3        | 1.76                    | 2.76      |        |       |           |       |              |           |       |       |           |         |

Avg., average gene expression relative to normal skin; Std. Dev, Standard Deviation.

Note: P-values listed for melanomas are in comparison to NMSC; † P-value < .05.; N/A, non-applicable

## References

- Alexander BM, Sprott K, Farrow DA, Wang X, D'Andrea AD, Schnitt SJ, *et al.* (2010) DNA repair protein biomarkers associated with time to recurrence in triple-negative breast cancer. *Clin Cancer Res* 16:5796-5804.
- Balch CM, Buzaid AC, Soong SJ, Atkins MB, Cascinelli N, Coit DG, *et al.* (2001) Final version of the American Joint Committee on Cancer staging system for cutaneous melanoma. *J Clin Oncol* 19:3635-3648.
- Breslow A (1979) Prognostic factors in the treatment of cutaneous melanoma. *J Cutan Pathol* 6:208-212.
- Dobbin KK, Beer DG, Meyerson M, Yeatman TJ, Gerald WL, Jacobson JW, *et al.* (2005) Interlaboratory comparability study of cancer gene expression analysis using oligonucleotide microarrays. *Clin Cancer Res* 11:565-572.
- Li C, Wong WH (2001) Model-based analysis of oligonucleotide arrays: expression index computation and outlier detection. *Proceedings of the National Academy of Sciences of the United States of America* 98:31-36.
- Riker AI, Enkemann SA, Fodstad O, Liu S, Ren S, Morris C, *et al.* (2008) The gene expression profiles of primary and metastatic melanoma yields a transition point of tumor progression and metastasis. *BMC Med Genomics* 1:13.
- Van Gelder RN, von Zastrow ME, Yool A, Dement WC, Barchas JD, Eberwine JH (1990) Amplified RNA synthesized from limited quantities of heterogeneous cDNA. *Proceedings of the National Academy of Sciences of the United States of America* 87:1663-1667.
- Warrington JA, Nair A, Mahadevappa M, Tsyganskaya M (2000) Comparison of human adult and fetal expression and identification of 535 housekeeping/maintenance genes. *Physiological Genomics* 2:143-147.
- Wood RD, Mitchell M, Lindahl T (2005) Human DNA repair genes, 2005. *Mutation Research* 577:275-283.
- Wood RD, Mitchell M, Sgouros J, Lindahl T (2001) Human DNA repair genes. *Science* 291:1284-1289.
